# Supplementary material for: Y chromosomal evidence on the origin of northern Thai people
Source: PubMed Central journal article supplement (PMC5524406; doi:10.1371/journal.pone.0181935), 2017-07-24

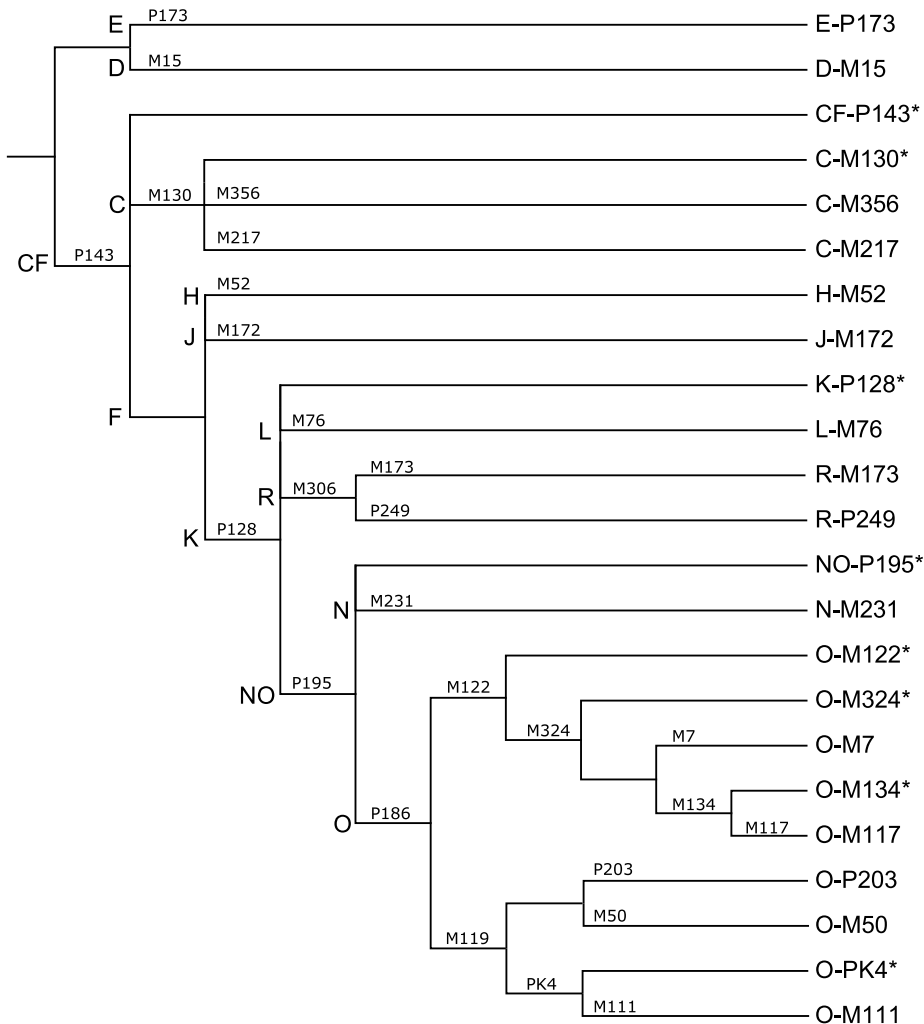

Supplement: pone.0181935.s001.pdf [file pone.0181935.s001.pdf]
